# Supplementary material
Source: Royal Society of Chemistry journal article supplement (doi:10.1039/d5tc03655k)
Supplement: d5tc03655k1.pdf [file d5tc03655k1.pdf]

Supplementary Information for:

## Enhanced Deep-Blue Emission and Quantum Yield of $\text{Ca}_{0.995}\text{YGaO}_4:0.5\%\text{Bi}^{3+}$ via Lithium-Based Flux Additives

A. Yousif<sup>a,b</sup>, Andrey Turshatov<sup>a\*</sup>, Dmitry Busko<sup>a</sup>, Krishnan Rajagopalan<sup>a</sup>, E. Coetsee<sup>c</sup>, Bryce S. Richards<sup>a,d\*</sup>,

<sup>a</sup> Institute of Microstructure Technology, Karlsruhe Institute of Technology, Hermann-von-Helmholtz-Platz 1, 76344 Eggenstein-Leopoldshafen, Germany

<sup>b</sup> University of Khartoum, Department of Physics, Faculty of Education, University of Khartoum, P.O. 321, Omdurman 11112, Sudan

<sup>c</sup> Department of Physics, University of the Free State, Bloemfontein ZA900, South Africa

<sup>d</sup> Light Technology Institute, Karlsruhe Institute of Technology, Engesserstrasse 13, 76131 Karlsruhe, Germany

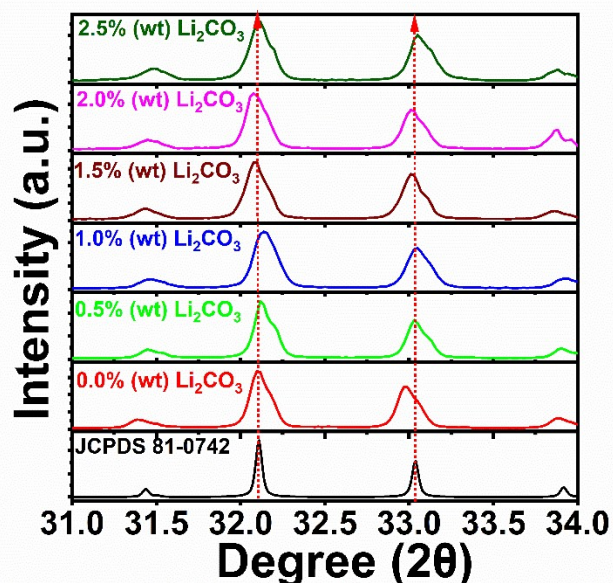

**Figure S1.** High-magnification Powder X-ray Diffraction (XRD) patterns of  $\text{Ca}_{0.995}\text{YGaO}_4:0.5\%\text{Bi}^{3+}$  phosphor materials synthesized using  $\text{Li}_2\text{CO}_3$  flux. The patterns show peak broadening.

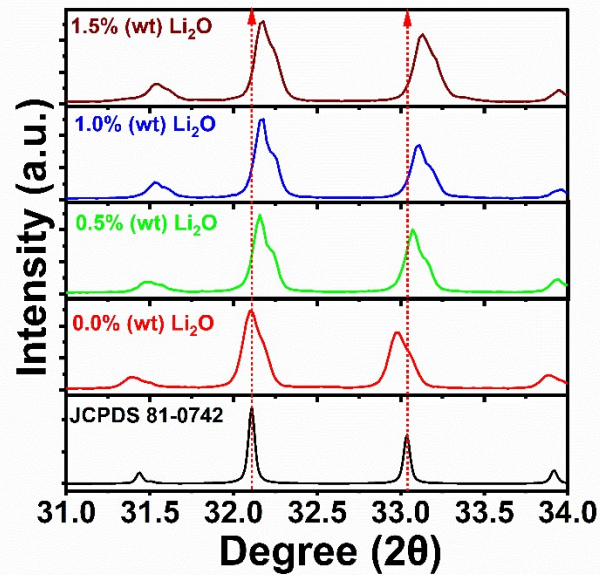

**Figure S2.** High-magnification Powder X-ray Diffraction (XRD) patterns of  $\text{Ca}_{0.995}\text{YGaO}_4:0.5\%\text{Bi}^{3+}$  phosphor materials synthesized using  $\text{Li}_2\text{O}$  flux. The patterns show peak broadening, and a shift to higher diffraction angles with increasing flux content.

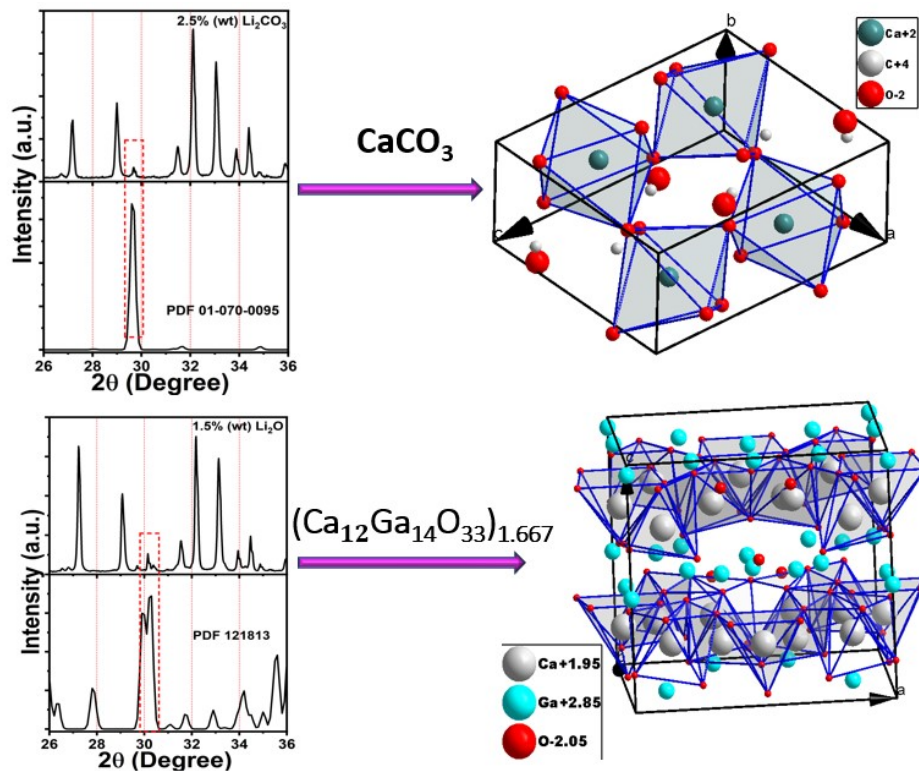

**Figure S3.** X-ray diffraction (XRD) patterns showing the formation of secondary phases induced by increased  $\text{Li}_2\text{CO}_3$  and  $\text{Li}_2\text{O}$  flux content. The observed peak matches ICSD PDF no. 01-070-0095, corresponding to a  $\text{CaCO}_3$  phase, while an additional emerging peak aligns with ICSD PDF no. 121813, attributed to the  $(\text{Ca}_{12}\text{Ga}_{14}\text{O}_{33})_{1.667}$  phase.

**Table S1.** Crystallographic parameters and Rietveld refinement details for CYGO:0.5% Bi<sup>3+</sup> samples synthesized using two different fluxes (Li<sub>2</sub>CO<sub>3</sub> and Li<sub>2</sub>O).

| Material                             | CaYGO4:0.5%Bi3+                        |                                        |
|--------------------------------------|----------------------------------------|----------------------------------------|
| Flux Used                            | Li <sub>2</sub> CO <sub>3</sub>        | Li <sub>2</sub> O                      |
| Crystal System                       | Orthorhombic                           | Orthorhombic                           |
| Space group (IT number, Z)           | P n m a                                | P n m a                                |
| constant a, b, c (Å)                 | a = 11.3538, b = 6.5718, c = 5.2890    | A = 11.3512, b = 6.5672, c = 5.2888    |
| $\alpha, \beta, \gamma$ (deg.)       | $\alpha = 90, \beta = 90, \gamma = 90$ | $\alpha = 90, \beta = 90, \gamma = 90$ |
| density (g/cm <sup>3</sup> ) Lattice | 4.341 g/cm <sup>3</sup>                | 4.304 g/cm <sup>3</sup>                |
| Volume(Å <sup>3</sup> )              | 394.6422                               | 394.2607                               |
| 2 $\theta$ range (deg.)              | 20° - 60°                              | 20° - 60°                              |
| 2 $\theta$ step Radiations           | 0.020302                               | 0.020302                               |
| Rietveld Parameters                  | Rexp = 7.67 %, $\chi^2 = 4.26$         | Rexp = 6.69%, $\chi^2 = 6.81$          |
| Refinement software                  | Full-Prof Rietveld refinement          |                                        |

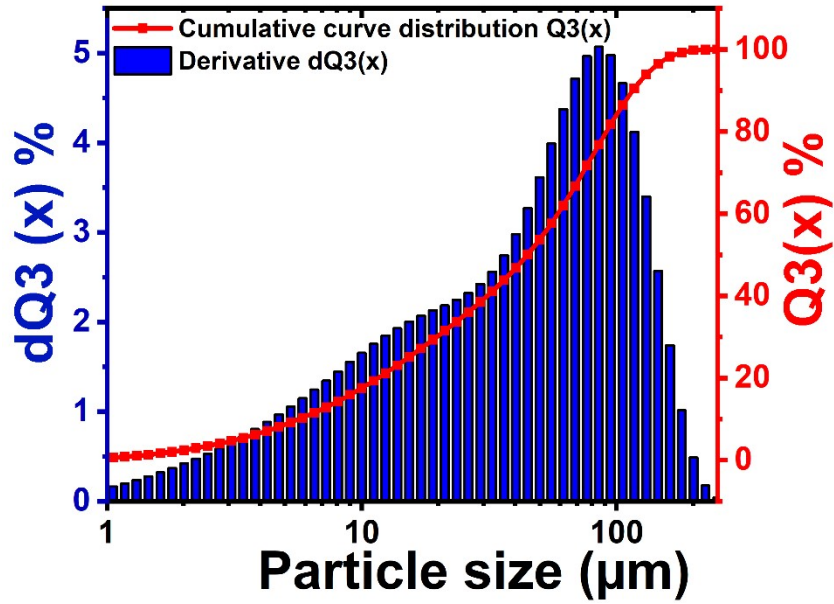

Figure S 4. illustrates the particle size distribution for the sample synthesized with  $\text{Li}_2\text{O}$  flux assistance, highlighting the emergence of a secondary population of larger particles.
